# Increased pattern similarity in two major olfactory cortices despite higher sparseness levels 1 2

Chaviva Markind, Prosenjit Kundu, Mor Barak, Rafi Haddad\* 3 4

The Gonda Multidisciplinary Brain Research Center, Bar-Ilan University, Ramat-Gan, 5290002, Israel. 5 6

\*Lead contact: rafi.haddad@biu.ac.il 7

## Abstract 8

Pattern separation is a fundamental process that enhances discrimination of similar stimuli and can be achieved by sparsening the neural activity and expanding the coding space. Odor stimuli evoke patterns of activity in the olfactory bulb (OB) and these activity patterns are projected to several cortical regions that contain larger numbers of neurons and show sparser activity levels. However, whether these projected patterns are better separated is still unclear. Here we compared odor responses in the OB, anterior piriform cortex (aPC) and anterior olfactory nucleus (AON) to the exact same odor stimuli. We found that odor representations are more similar, noisier and less distinctive in aPC and AON than in the OB. The increase in similarity was observed for both similar and dissimilar odors. Modeling odor transformation from the OB to the olfactory cortex using simulated as well as actual OB odor responses as inputs, demonstrates that the observed rise in odor representation similarity can be explained by assuming biologically plausible variation in the number of OB inputs each cortical neuron receives. We discuss the possible advantages of our findings to odor processing in the aPC and AON. 9 10 11 12 13 14 15 16 17 18 19 20 21 22 23

## Highlights 24 25

- Odor representations in the aPC and AON are more correlated despite increase in sparseness levels. 26
- Odor identity is best represented in the OB. 27
- Variance in the number of inputs from OB can explain the reduction in odor separation. 28

## Introduction 29

Pattern separation is the process by which similar neural representations become more distinct. Classical theoretical works suggest that reduction in pattern similarity can be achieved through expansion from a low dimensional space to a high dimensional space together with sparsening<sup>1</sup>. Dimensionality expansion and sparse representations that improve pattern separation have been reported in many sensory systems, the cerebellum and in the hippocampus<sup>2,3</sup>. 33

Expansion through random projection and sparsening are well documented in the olfactory system. In *Drosophila*, ~150 antenna lobe projection neurons (PNs) output olfactory information to ~2500 Kenyon cells in the mushroom body<sup>4</sup>. Kenyon cells are much more selective to odors because they have higher response thresholds, receive broad feedback inhibition, integrate from a small number of PNs and decay quickly. As predicted by theory, odor ensemble representations in the mushroom body are decorrelated<sup>5</sup>. Similarly, in the olfactory bulb (OB) of rodents, there are ~50,000 mitral and tufted (MT) cells that project mostly non-topographically to several olfactory cortical regions including the anterior olfactory nucleus (AON) and anterior piriform cortex (aPC)<sup>6-8</sup>. These regions are believed to contain at least an order of magnitude more neurons than in the OB<sup>9</sup>. 39

It is generally thought that odor representations in the aPC are sparser than in the OB<sup>9-16</sup> and mostly decorrelated, and that the aPC makes odor discrimination more robust<sup>16-19</sup>, facilitating odor identity coding<sup>20,21</sup>. A recent study that modeled the OB to PC circuitry as a random feed-forward network that expands and sparsens the input, showed that PC should decorrelate odor activity patterns<sup>14</sup>. One empirical study found that odor mixtures that differ by more than one component are indeed less similar in aPC than in OB<sup>22,23</sup>. However, a comprehensive comparison of odor representation similarity in OB and aPC is still lacking. Furthermore, how odors are represented in the AON is much less investigated and understood.

Here we compared odor representations and coding principles in the OB, AON and aPC using a set of nine odorants which include similar and dissimilar odor-pairs. We defined odor similarity by either representing each odorant in the physicochemical space using their molecular descriptors, or in the neural space using the OB activity patterns. Our results indicate that in contrast to what is expected from theory, odor representations in these cortical regions are more correlated, noisier and represent odor identity less distinctively than the OB. This increase in similarity occurred despite higher sparseness levels in the cortex and for odor-pairs of all similarity levels. Using simulation models that use experimental and simulated OB odor responses as inputs, we suggest a biologically plausible modification of the aforementioned feed-forward network<sup>14</sup> that can explain these findings.

## Results

### Odor representations in the OB, aPC and AON

To compare odor representations across different brain regions we 73

extracellularly recorded the neural responses to nine odor stimuli in the OB, aPC and 74

AON in anesthetized mice under the exact same experimental conditions (Figure 1A, 75

Methods). The nine odorants used included structurally diverse odorants well 76

separated in the physicochemical odor space<sup>24</sup> as well as similar ones (Figure 1B, 77

Methods). We recorded the activity of 101 neurons in OB, 200 in aPC and 138 in 78

AON. As in previous studies, the spontaneous activity was higher in the OB than in 79

the cortex (Figure 1–figure supplement 1A). The spiking activities in individual 80

neurons in the three regions were strongly coupled to respiration (Figure 1C-D and 81

Figure 1–figure supplement 1B). Interestingly, compared to the OB and aPC, a 82

relatively small percentage of AON neurons preferred to fire during inhalation (Figure 83

1D). The population mean in all three regions peaked shortly after the transition 84

between inhalation and exhalation, with mean aPC and AON neurons’ odor-evoked 85

peaks occurring slightly before the OB (Figure 1E and Figure 1–figure supplement 86

1C). Odor responses began in the three regions in the first sniff post odor onset and 87

continued throughout the three respiration cycles that occurred during the 2 seconds 88

of odor presentation (Figure 1–figure supplement 1C-D). As reported in previous 89

studies, the number of odors each neuron in the OB responded to was distributed 90

exponentially with most neurons not responding to any of the odors and very few 91

responding to multiple odors (Figure 1F). On average, each odor activated  $3.63 \pm$  92

$0.617\%$  (mean  $\pm$  SE) and suppressed  $2.09 \pm 0.348\%$  of OB neurons in the first sniff 93

post odor onset (Figure 1G-H). Consistent with<sup>25</sup>, very little inhibition was found in 94

the AON ( $0.966 \pm 0.241\%$  suppressed vs.  $19.163 \pm 1.22\%$  activated neurons) and 95

neuron responses to odors were stronger and more broadly tuned. aPC neurons’ 96

response selectivity was in between, more similar to OB (Figure 1F-H). 97

To compare the sparseness levels in the three brain regions, we calculated the commonly used Treves-Rolls lifetime and population sparseness indices<sup>26</sup> with modifications<sup>12,27</sup>. The Treves-Rolls methods estimate the amount of non-uniformity of the neural response to the stimuli (Methods). Computing the Treves-Rolls indices we found that odor responses in both the aPC and AON are significantly sparser than in the OB in terms of lifetime and population sparseness (Figure 1I-J).

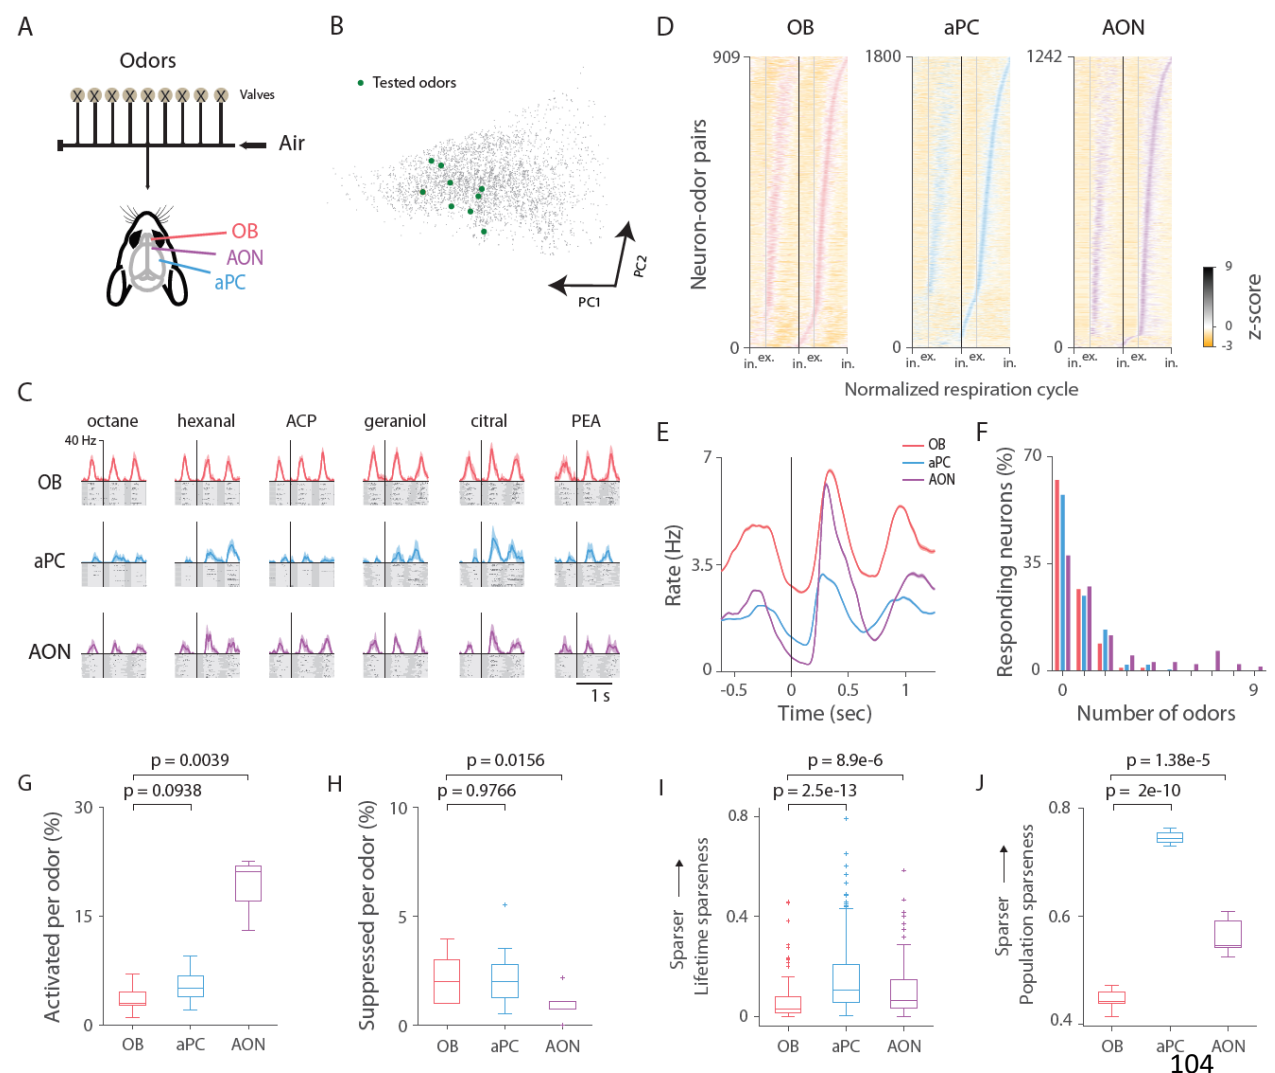

**Figure 1. Odor-evoked activity in the olfactory bulb, anterior piriform cortex and anterior olfactory nucleus. (A)** Experimental schematic. Extracellular recordings of neural responses to nine odor stimuli in OB, aPC and AON in anesthetized mice. **(B)** 4359 odorant molecules depicted in principal component

space (Methods). Green circles mark the odorants used in the study. **(C)** Responses of 109  
example neuron in OB (red), aPC (blue) and AON (purple) to twenty presentations of 110  
six odors. See methods for all nine odorant names. Raster plots and PSTHs are 111  
aligned to the first inhalation post odor onset. Dark gray and light gray shadings 112  
indicate the inhalations and exhalations, respectively. Odor duration was 2 seconds. 113  
**(D)** Normalized PSTHs for all OB, aPC and AON neuron-odor pairs sorted by latency 114  
to peak in the first sniff post odor onset. Each respiration duration is stretched or 115  
squeezed according to the median respiration duration. Spikes were reassigned to their 116  
original relative inhalation or exhalation phase in this mutual standardized respiration 117  
cycle. ‘in.’ and ‘ex.’ indicate the inhalation and exhalation start times, respectively. 118  
Black vertical line marks the start of the first inhalation post odor onset. **(E)** Average 119  
PSTH of all odors’ mean elicited responses across all neurons (101 neurons in OB, 120  
200 in aPC and 138 in AON, Methods). **(F)** Percentage of neurons that significantly 121  
responded to specific numbers of odors ( $p < 0.05$ , Wilcoxon rank-sum test) in the first 122  
sniff post odor onset in OB, aPC and AON. **(G-H)** Percentage of neurons per odor 123  
that responded significantly with an increase **(G)** or decrease **(H)** in spike count in the 124  
first sniff post odor onset (OB vs aPC or OB vs AON, Wilcoxon signed-rank test). **(I-** 125  
**J)** Treves-Rolls lifetime and population sparseness in the first sniff post odor onset 126  
(Wilcoxon rank-sum test and paired t-test ( $df = 8$ ), respectively). 127

128

## **Odor identity is best represented in the olfactory bulb** 129

Theoretical considerations suggest that expansion of the neural space and 130  
sparsening the neural responses play a key factor in decorrelating responses in 131  
feedforward networks and improve linear separability. To analyze the similarity of 132

different odor representations at the population level, we represented each odor as a  
vector of evoked mean spike counts during the first sniff post odor onset. We  
averaged across trials as in previous studies<sup>12,15,28,29</sup> so as to reduce the inherent trial-  
to-trial variability. We subtracted the baseline activity to reflect signal correlation  
rather than the high baseline population correlation due to spontaneous firing rates  
(see Methods). Using these activity vectors, we computed the Pearson correlation  
coefficient between all odor pairs (36 odors pairs in three brain regions, Figure 2A-B).  
We found that odor representations were significantly more correlated in the cortex  
than in OB ( $p = 0.00112$ , OB vs aPC;  $p = 1.63e-14$ , OB vs AON, paired t-test,  $df =$   
35). Odor representations in AON were particularly similar (mean  $\pm$  SEM,  $r_{AON} =$   
 $0.6567 \pm 0.025$ ), intermediate in aPC ( $r_{aPC} = 0.361 \pm 0.025$ ) and least similar in OB  
( $r_{OB} = 0.234 \pm 0.036$ ). Compatible results were obtained when we used spike rates  
instead of spike counts (Methods). Odor representations were more similar in the  
cortex than in OB for odor-pairs of diverse similarity levels in the physicochemical  
space (Figure 2–figure supplement 1A). Notably, when comparing odor-pairs based  
on their similarity level in OB, in both cortical regions the increase in pairwise  
similarity for non-similar odor pairs was greater than for similar odor pairs (Figure  
2C).

MT neuron odor responses have complex temporal dynamics including epochs  
of excitation and inhibition<sup>30,31</sup> while aPC neuron odor responses are much less  
dynamic with typically one transient excitatory epoch<sup>12,19</sup>. To test if this distinction  
may underlie the difference in odor similarity, we calculated the odor correlations in  
accumulative and moving window bins of the first sniff and found that the mean odor-  
pair correlations increased in aPC and AON relative to OB throughout the respiration  
cycle (Figure 2D and Figure 2–figure supplement 1B). The result was consistent

across several sniffs post odor onset in both the aPC and the AON (Figure 2—figure supplement 1C). 158 159

The increase in odor representation correlation in aPC and AON may suggest 160 that odor identities are better represented in the OB than in the two subsequent 161 cortical regions we examined. However, an increase in similarity does not necessarily 162 imply a reduction in representation separation as it also depends on the response 163 variability. Low response variability could result in an improved representation even 164 when distinct objects are represented as more similar to one another. We therefore 165 compared the odor response trial variability across brain regions using the coefficient 166 of variation metric (CV, Methods). The CV is defined as the ratio of the standard 167 deviation to the mean and therefore is a normalized measure of variability and suited 168 for comparison of brain regions with different baseline and mean odor response firing 169 rates. We found that the trial variability is higher in the cortex than in OB in both aPC 170 and AON (Figure 2E and Figure 2—figure supplement 1D). 171

The analyses so far show that odor representations are noisier and more 172 similar in the two examined olfactory cortical regions. To better evaluate the level of 173 odor representation separation in these regions, we conducted a decoding analysis. 174 This analysis takes into account both the similarity of the representations of different 175 odors and the variation within trials of the same odor. To this end, we tested how well 176 a linear decoder can identify an odor given the population response of one held-out 177 trial. We trained a centroid-based leave-one-out pattern matching linear decoder on 178 activity vectors of the neurons' spike counts in the sniffs during the odor stimulation 179 (Methods). We used a linear decoder because theory suggests that expansion and 180 sparsening are expected to improve linear separability. Performing a decoding 181



analysis as a function of the number of neurons we found that OB has higher  
identification decoding accuracy than aPC and AON (Figure 2F. See Methods).

We conclude that odor representations in the OB are more decorrelated and  
more accurate in terms of response consistency and identity decoding than in the  
AON and aPC. This contrasts with the common belief that aPC neurons perform  
pattern separation.

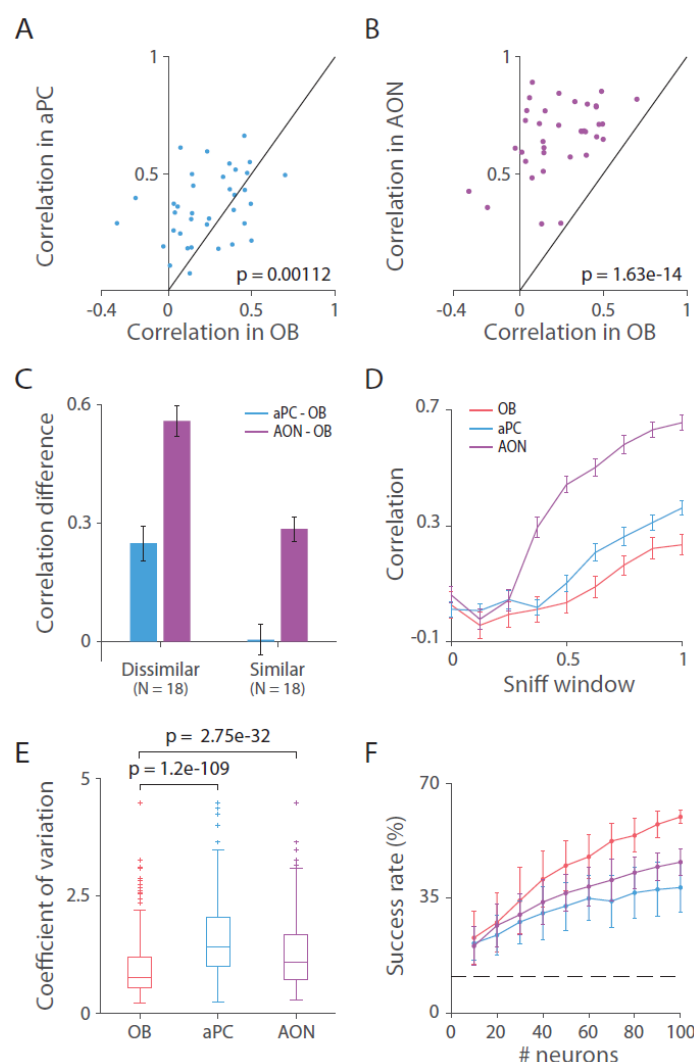

**Figure 2. Odor identity is best represented in the olfactory bulb. (A-B)** 36 odor-  
pairwise correlations in the first sniff post odor onset in aPC (A) and AON (B) versus  
those in OB. Identity line is indicated in black. Mean odor-evoked neural

representations are more similar in the cortex than in OB (paired t-test, OB vs aPC or 192  
OB vs AON,  $df = 35$ ). **(C)** Mean  $\pm$  SEM of the difference in correlations in the first 193  
sniff between the cortical regions and OB of odor-pairs that are dissimilar ( $r <$  194  
median) and similar ( $r \geq$  median) in OB. There is a larger increase in odor similarity 195  
in the aPC and AON for dissimilar odors than for similar ones. **(D)** Mean  $\pm$  SEM odor 196  
pairwise correlations calculated using the activity in accumulative windows of the 197  
first sniff post odor onset (window size is an 1/8 of the sniff). **(E)** The coefficient of 198  
variation across trials in the first sniff post odor onset. Trial variability is higher in the 199  
cortical regions than in the OB (Wilcoxon rank-sum test, OB vs aPC or OB vs AON). 200  
**(F)** Odor identification decoding accuracy as a function of the number of neurons. OB 201  
has higher decoding accuracy than aPC and AON. Displayed is the mean  $\pm$  SD of the 202  
success rate of the decoder on all 9 odors in 100 random samplings of neurons (out of 203  
a total of 101, 200 and 138 neurons in OB, aPC and AON, respectively). Decoder was 204  
trained on activity vectors of the average spike counts in the duration of the three 205  
sniffs taken throughout the odor presentation, across 15 trials. Dashed line marks the 206  
chance level accuracy (11.11%). 207

## Checking our result on published data 209

To test whether the increase in pattern similarity and reduction in odor identity 210  
decoding that we observed is specific to our selection of odors or experimental setup, 211  
we utilized data from a recently published study of neural activity recorded 212  
simultaneously in the OB and aPC of several awake mice passively exposed to six 213  
different odors (Figure 3—figure supplement 1A, <sup>19,32</sup>). Comparing OB and aPC odor 214  
representations in this dataset, we found consistent results: Odor representations in 215

aPC are sparser than in OB (Figure 3A-B), more correlated for both similar and  
dissimilar odors (Figure 3C-D and Figure 3-figure supplement 1B-D) and more  
variable (Figure 3E). Furthermore, odor identity decoding accuracy is higher in OB  
than in aPC (Figure 3F). It is important to note here that our measure of odor  
similarity is different than the measure in <sup>16,18</sup>, where correlations were computed on  
the trial-by-trial responses and without subtracting the baseline. We computed the  
correlation as in previous related studies <sup>12,15,28,29</sup> using the trial-averaged evoked  
responses because it is more suitable for the purpose of this study which is to compare  
odor representation across brain regions. Computing trial-by-trial correlations is  
beneficial for comparing within and between odor similarities.

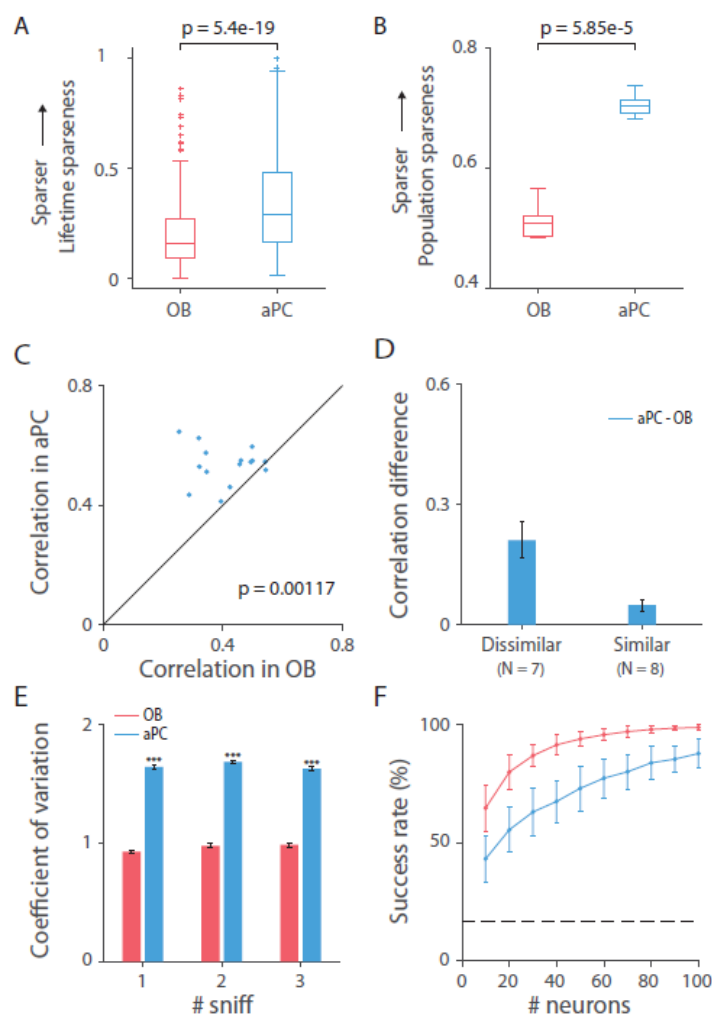

226

**Figure 3. The reduction in odor representation in the cortex extends beyond our** 227  
**datasets.** This figure displays results of analyses conducted on data of OB and aPC 228  
published in <sup>19,32</sup>. **(A-B)** Treves-Rolls) lifetime and population sparseness in the first 229  
sniff post odor onset (Wilcoxon rank-sum test and paired t-test (df = 5), respectively). 230  
**(C)** 15 odor-pairwise correlations in the first sniff post odor onset in aPC versus those 231  
in OB (paired t-test, OB vs aPC, df = 14). **(D)** Mean  $\pm$  SEM of the difference in 232  
correlations in the first sniff between aPC and OB of odor-pairs that are dissimilar ( $r <$  233  
median) and similar ( $r \geq$  median) in OB. **(E)** Mean  $\pm$  SEM coefficient of variation 234  
across trials in the first three sniffs post odor onset (Wilcoxon rank-sum test for each 235  
sniff, OB vs aPC). **(F)** Odor identification decoding accuracy as a function of the 236  
number of neurons. OB has higher decoding accuracy than aPC. Displayed is the 237  
mean  $\pm$  SD of the success rate of the decoder on all 6 odors in 100 random samplings 238  
of neurons (out of a total of 271 and 659 neurons in OB and aPC, respectively). 239  
Decoder was trained on activity vectors of the average spike counts in the duration of 240  
the two sniffs taken throughout the odor presentation, across 15 trials. Dashed line 241  
marks the chance level accuracy (16.67%). 242

### **Variance in the number of inputs increases odor correlations** 244

The experimental results show that although the odor neural response is 245  
expanded and sparsened in the aPC and AON compared to the OB, its identity 246  
representation is not improved in terms of neural representation correlation and 247  
identity decoding. This is in contrast to what is expected from a simple feed-forward 248  
transformation with random connections as was demonstrated in a recent feed- 249  
forward model that simulated a two-layer network representing the OB and PC <sup>14</sup>. In 250

this model, each of the 10000 simulated PC neurons received input from a random set of 60% of the total 1000 simulated OB neurons. Each PC neuron applied a Heaviside function on the sum of its OB inputs after subtracting a fixed threshold. The threshold was chosen such that an average of 6.2% of PC neurons were activated by the odors, matching their imaging data <sup>14</sup>. It was assumed that the number of OB inhibitory inputs is twice the number of excitatory ones with half the efficacy (i.e., ~40% of the connections had a weight of -0.5 and ~20% had a weight of 1). These parameters ensured balanced excitation and inhibition inputs that mimic the balanced afferent excitatory and recurrent inhibitory inputs each aPC neuron receives <sup>13</sup>. Probing this model with three sets of simulated odor responses with different levels of similarity (non-class odors, 30% overlap class odors, and 70% overlap class odors) it was shown that, odor pairwise correlations in PC are expected to be lower than in the OB (Figure 4A, dots below the identity line).

We sought to understand how a feed-forward network could nevertheless underlie the experimentally observed increase in correlations and decrease in identity decoding. The above model assumed that each PC neuron integrates from normally distributed numbers of OB inputs with relatively small variability (SD of 1.2% and 1.5% for the excitatory and inhibitory connections, respectively). The number of OB neurons each aPC and AON neuron receives inputs from and their variability is currently unknown. An anatomical study estimated the number of direct inputs to aPC and AON to be up to a few 10's <sup>6</sup> while an electrophysiological study suggested that the number of direct (and probably indirect) connections to aPC might be as high as 10% of the overall number of glomeruli <sup>33</sup>. We therefore examined how odor representations depend on the variability in the number of connections for various average number of connections (keeping the ratio between excitatory and inhibitory

connections set to two). First, fixing the average number of inputs as in the model 276  
described above, we found that odor representation correlation increased as a function 277  
of connection number variability (Figure 4A-B). For the non-class and 30% overlap 278  
class, assuming a SD of ~4-6% or ~9-13% of the number of OB inputs can explain the 279  
increases in odor representation correlation observed in the aPC and AON 280  
experimental data, respectively (Figure 4B). Moreover, the increase in correlations in 281  
the simulated PC was larger for odors that were considered dissimilar (less correlated) 282  
in the OB (Figure 4A), consistent with the experimental results (Figure 2C and Figure 283  
3D). Simulating the transformation with different average numbers of connections 284  
showed that the increase in odor correlations due to variability in the number of 285  
connections was stronger when the average number of connections and the SD levels 286  
were relatively small (Figure 4C, for the 30% overlap class). 287

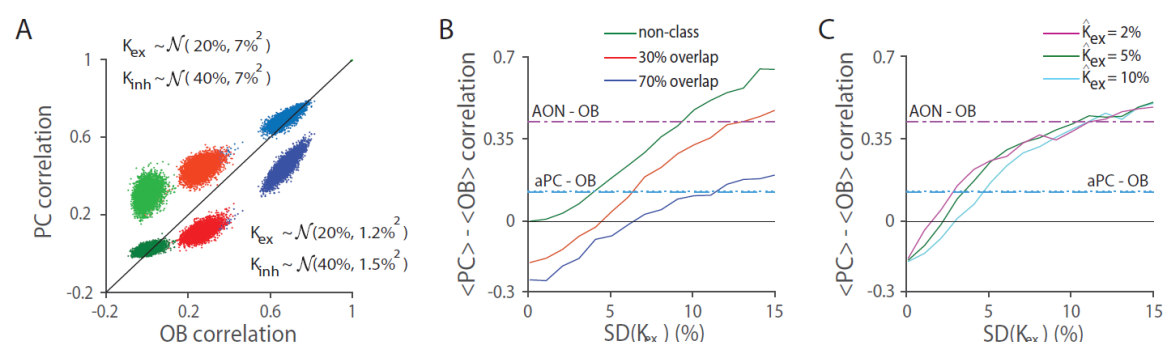

**Figure 4: Variability in the number of connections increases odor-pairwise 289**  
**correlations. (A)** Correlation of PC ensemble representations versus correlation of 290  
OB ensemble representations. Green, red and blue dots represent pairwise correlations 291  
of non-similar odor pairs (non-class), mildly similar odor pairs (30% glomeruli 292  
overlap) and highly similar odor pairs (70% glomeruli overlap) as in Schaffer et al. 293  
model. Lighter versions of the same colors are used to plot the corresponding classes 294  
when we assumed that the number of connections with positive weights (K<sub>ex</sub>) and 295

negative weights ( $K_{inh}$ ) are drawn from normal distributions with the same means but  
larger variances, as specified. The values of the means and standard deviations are  
stated as percentages of OB neurons. **(B)** The difference between the mean  
correlations in PC and OB as a function of the standard deviation of the number of  
positive connections, with the mean number of connections fixed as in **(A)**. The  
variability in the negative connections is the same as in the positive connections. Blue  
dotted and dashed overlapping lines mark the difference between the experimental  
mean correlations in aPC and OB in our dataset and in the Bolding 2018 dataset,  
respectively. Purple dash-dot line marks the difference between the experimental  
mean correlations in AON and OB data. **(C)** The difference between mean pairwise  
correlation in PC and OB as a function of the standard deviation of the number of  
positive connections for the 30% overlap class of odors with different average  
numbers of positive connections, where the average number of negative connections  
is twice as large with half the efficacy. The variability in the negative connections is  
the same as in the positive connections. Colored horizontal lines as in **(B)**.

## **Exploring the effect of the threshold level, number of connections and their variability on odor representations in the cortex**

We next explored the effect of the parameters in a similar feed-forward model  
that uses actual OB neural odor responses as inputs, rather than artificially generated  
odor response patterns. We assumed that as in the original model, each PC neuron  
integrates from a random set of OB neurons and responds only if the sum of the inputs  
it receives from the OB is higher than some threshold value  $T$ . That is,

$$PC = \Theta(W \cdot OB - T); \text{ where } \Theta(x) = x \text{ if } x > 0 \text{ and } \Theta(x) = 0 \text{ otherwise}$$

where  $OB$  and  $PC$  denote ‘neurons X odors’ response matrices of the OB and PC

neurons' odor responses, respectively; and  $W$  is the connectivity matrix through which PC neurons are connected to the OB neurons. We used the 271 X 6 OB neuron-odor trial-averaged responses from the Bolding 2018 dataset as this dataset was larger and therefore more suitable for this simulation, but the results are similar when using the OB neurons from our recordings as input to the model. To remove the high inherent correlation caused by the spontaneous firing of MT cells and to take into account that some odors actually reduce the number of spikes an MT neuron fires, and therefore the number of spikes the PC neuron receives, we subtracted their baseline activity (Methods). Thus, in this model MT responses could have positive and negative values reflecting excitatory and inhibitory responses, respectively. We therefore set all connection weights to one. We set the number of PC neurons to be ten times the number of available OB neurons.

We first examined how PC neurons' threshold level affects PC odor representations as a function of the number of inputs each PC neuron receives from the OB, when there is no variability in the number of inputs. To assess this, we no longer assumed that only 6.2% of PC neurons respond on average and that excitation balances inhibition. We first noticed that when responses were only required to be non-negative (i.e.,  $T = 0$ ), the odor correlations in PC did not differ from those in the OB, regardless of the number of connections (pink line in Figure 5A). The sparseness level decreased as we increased the number of connections (Figure 5B, pink line). Increasing the threshold level confirmed that PC odor representations were decorrelated and sparsened (Figure 5A-B), as expected by theory<sup>34</sup> and as demonstrated in<sup>14</sup>. Increasing the number of connections counteracts the effect of thresholding as the PC activity becomes less decorrelated and its sparseness level begins to saturate (Figure 5A-B). Considering threshold values that are drawn from a



normal distribution revealed stronger decorrelation and sparsening effects (Figure 5C- 345  
D). 346

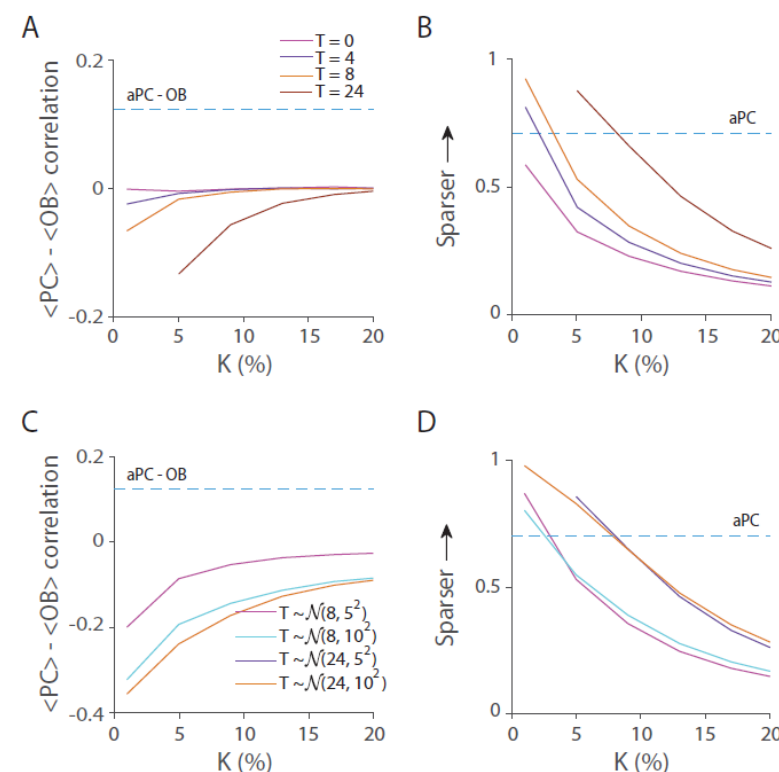

**Figure 5. Thresholding decorrelates and sparsens odor responses.** (A) The 348  
difference between PC and OB mean odor pairwise correlations as a function of the 349  
number of connections (marked as K) for several selected threshold values. The mean 350  
correlation did not change in the absence of a shift from zero thresholding ( $T = 0$ , 351  
pink line). Higher thresholding values decorrelate PC odor representations when the 352  
number of connections is relatively small. Blue dashed horizontal line marks the mean 353  
difference in the Bolding 2018 dataset. (B) Population sparseness level of the 354  
simulated PC neuron responses for the threshold values in (A). Thresholding 355  
sparsened the PC neural activity for small K. Blue dashed horizontal line marks the 356  
mean population sparseness in the aPC of the Bolding 2018 dataset. (C) Mean odor 357  
pairwise correlation difference when the threshold (T) is normally distributed as 358

specified. **(D)** Population sparseness levels for each threshold distribution 359  
corresponding to **(C)**. Blue dashed lines as in **(A-B)**. 360

361  
We next examined how the variability in the number of connections affects 362  
odor representations. We found that as in the previous model, the higher the 363  
variability the more correlated the odor representations became (Figure 6A). The 364  
actual mean connection number did not have a substantial effect on the increase in 365  
odor correlations (Figure 6A) but did affect the sparseness level, with high number of 366  
connections tending to generate a denser neural response (Figure 6B). When assuming 367  
the number of connections is distributed according to an exponential distribution, we 368  
observed an increase in correlation and decrease in sparseness levels as the mean 369  
number of connections (and therefore the standard deviation) increased (Figure 6C- 370  
D). 371

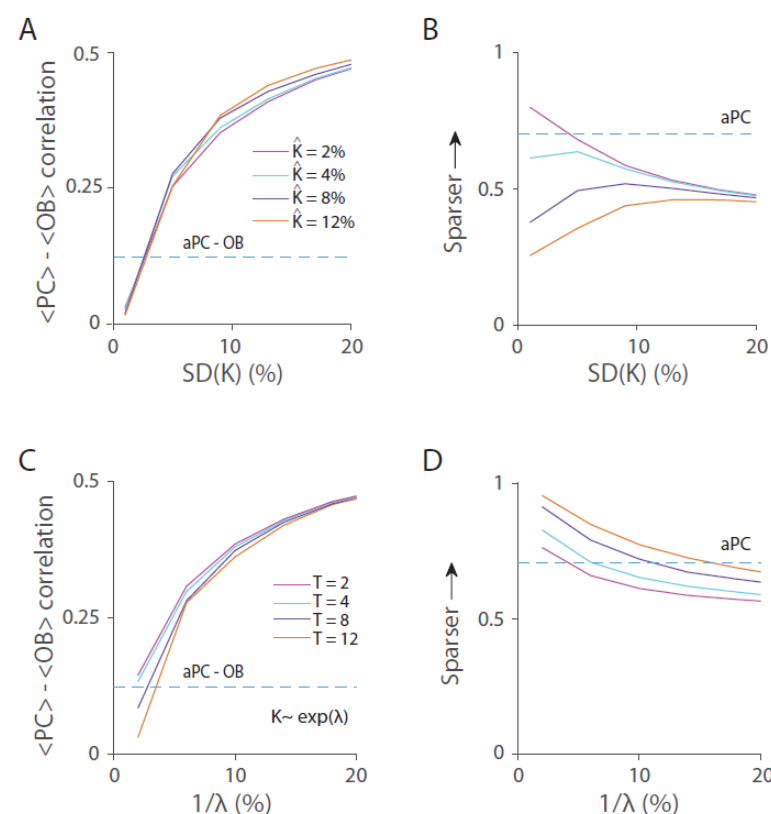

372

**Figure 6. Variability in the number of PC inputs increases odor pairwise correlations in PC.** (A) Mean difference in correlation as a function of the standard deviation of the number of connections (marked as K). Several mean K values were examined, as specified. Threshold was fixed to 12 spikes/sniff. The odor-pair correlations increase as the variability in K increases, irrespective of the mean number of connections. (B) Population sparseness levels corresponding to the conditions in (A). Blue dashed lines as in Figure 5. (C-D) Same as in (A-B) when the number of connections is extracted from an exponential distribution as specified by  $\lambda$ . Results are displayed as a function of the average number of connections, which is equal to the standard deviation of the distribution. The correlation increases and sparseness decreases as the SD of the number of connections increases.

Finally, we assessed the effect of variability in the number of connections on odor identity decoding. For this purpose, we input to our model the OB responses without subtracting the baseline, as was done for the decoding analysis of the experimental data (see Methods), and randomly set inhibitory and excitatory weights as in Schaffer's model (see Methods). We performed a decoding analysis using the simulated PC neurons as inputs to the decoding algorithm. We found that consistent with the increase in correlations, the decoding accuracy decreased with the increment in connection variability in both the normal and exponential distribution models, irrespective of the average number of connections or threshold values (Figure 7A-B).

We conclude that assuming a reasonable level of variability in the number of connections each PC neuron forms with the OB can explain the observed increase in odor representation correlations and decrease in identity decoding accuracy, despite

higher sparseness levels. Specifically, assuming that each PC neuron is randomly  
connected to ~1-5% of the OB inputs and that these numbers follow an exponential  
distribution, or a normal distribution with low SD fits well with the experimentally  
observed increase in odor pairwise correlations, reduced decoding accuracy and  
increase in sparseness levels in aPC.

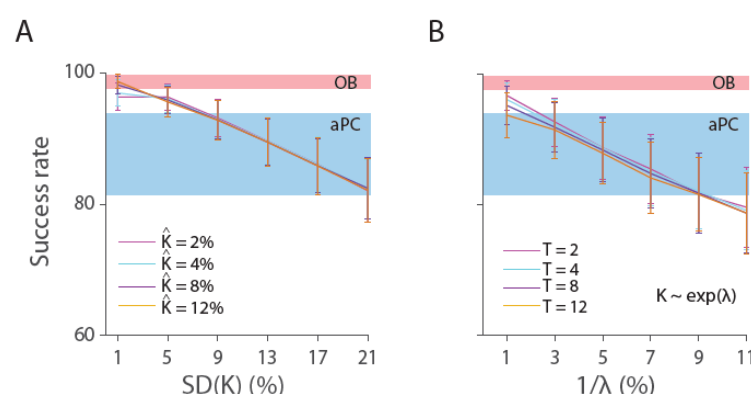

**Figure 7. The effect of variability in the number of connections on odor decoding accuracy.** (A-B) Odor identification decoding accuracy as a function of the variability in the number of connections. Decoding accuracy decreases with the increase in variability. Results show the mean  $\pm$  SD of the success rate of the decoder on six odors of 20 different simulations of PC, where in each simulation the mean was calculated from 50 random samplings of 100 PC neurons out of a total of 2710. Red and blue patches mark the decoding accuracy range (mean  $\pm$  SD) computed when using 100 neurons in OB and aPC from the Bolding 2018 dataset. (A) The number of connections is drawn from a normal distribution as specified. The threshold was fixed to 12 spikes/sniff. (B) The number of connections is distributed exponentially as specified. Several threshold values were examined.

## Discussion

## **Expansion, sparseness and separability** 416

Increasing coding space through expansion and sparsening of the neural 417  
activity and thresholding are considered key computational mechanisms underlying 418  
the improvement in neural representation observed in several sensory systems, the 419  
cerebellum and the hippocampus <sup>1</sup>. Our results show that although information from 420  
the OB is expanded and sparsened in the aPC and AON, its representation is not 421  
improved in terms of similarity and identity coding. We further verified the results 422  
using data collected in another lab using different odors and a different awareness 423  
state. These findings may reflect a fundamental distinction between odor coding and 424  
other sensory stimuli coding. A visual stimulus, for example, is decomposed into 425  
basic features such as contrast and colors, which are then integrated to build more 426  
complex features such as orientations, and these are further integrated to robustly 427  
represent the object invariantly to scale and rotation <sup>35</sup>. Odors, on the other hand, are 428  
encoded by the subset of receptors that are activated by the odorant molecules. 429  
Moreover, odor responses are decorrelated by several OB interneurons that further 430  
improve odor representations <sup>28,29,36–38</sup>. This may suggest that unlike in some other 431  
sensory systems, no additional decorrelation stages are required as the OB already has 432  
all the necessary odor information to robustly identify the odor. 433

During the process of writing this manuscript two papers have been published 434  
that examined odor representations in the OB and PC. Bolding et al. <sup>16</sup>, also found a 435  
reduced decoding accuracy in aPC compared to the OB in the awake state as we 436  
found in our datasets and in our analysis of the data from <sup>19</sup>. However, in the 437  
anesthetized state they found that odor identity decoding accuracy is actually better in 438  
aPC than in OB. One possible reason for this difference in result is the anesthesia 439  
methods used. We started the recording at least an hour after the first anesthesia 440

induction and administered additional doses of anesthesia as the animal showed signs 441  
of awakening. In Bolding et al, a single bolus of injection was given, and the 442  
experiments were conducted shortly after initial induction within the first ~30-45 443  
minutes. This might ensue a different level of anesthesia which results in stable neural 444  
activity in aPC as they found. This might also explain why they observed a surprising 445  
reduction in OB and an increase in aPC responsiveness during anesthesia which was 446  
not found in previous OB<sup>39-41</sup> and PC studies<sup>15</sup>. We note that this study also reported 447  
a reduced trial-to-trial correlation in aPC. As stated above (and see Methods) we used 448  
the trial-averaged evoked activity to estimate odor representation similarity as it is 449  
more suitable to the analysis conducted here. Trial-to-trial correlation depends on the 450  
response variability and thus the reduction in trial-to-trial correlation they found is 451  
consistent with the increase in aPC response variability and the lower odor identity 452  
decoding accuracy in the aPC that we found. 453

A second study by Pashkovski et al.<sup>15</sup>, reported that odor correlations in PC 454  
were higher for chemically similar odors and reduced for dissimilar ones in awake 455  
artificially breathing mice. In our and in the Bolding 2018 datasets, we find that 456  
dissimilar odors as quantified by their OB representation or their molecular 457  
descriptors are more similar in aPC (and AON) (Figure 2A-C, Figure 3C-D, Figure 2– 458  
figure supplement 1A, and Figure 3–figure supplement 1B). This difference between 459  
the results could be due to different recording locations. We recorded in the anterior 460  
parts of the PC while Pashkovski et al. recorded in the anterior parts of the posterior 461  
PC. The posterior PC is known to have more associative connections compared to the 462  
aPC<sup>20,42,43</sup> and therefore is considered an associative structure whereas the AON and 463  
aPC more resemble feedforward networks. Consistent with this, it has been shown 464  
that posterior PC encodes odor quality while aPC encodes odor structure<sup>44-46</sup>. 465

Interestingly, despite these differences in the correlation structure, Pashkovski et al. 466  
also found an increase in variability and decrease in decoding accuracy in this part of 467  
the PC compared to the OB as we found in AON and anterior PC. 468

Taken together, all these studies strongly suggest that during the 469  
transformation from the OB to the AON and the aPC, odors are represented as more 470  
similar, have higher noise levels and are harder to decode. This change in 471  
representation is in contrast to what is expected from classical random feedforward 472  
models that expand and sparsen the representation. 473

# **Anterior PC versus OB odor coding** 474

One possible explanation for the decrease in odor identity representation in 475  
aPC might be that aPC neurons are involved in encoding behavioral relevance. 476  
Several studies found evidence that aPC neurons are involved in valence coding <sup>47</sup>, 477  
odor preference learning <sup>48</sup>, appetitive odor retrieval <sup>49</sup> and flavor conditioning <sup>50</sup>. 478  
Two highly dissimilar odors can have the same behavioral relevance and therefore 479  
could be encoded similarly in aPC. This may explain why identity representation is 480  
reduced in aPC compared to the OB as in all the analyzed databases, the mice did not 481  
have to attribute valence to the presented odors and the behavioral outcome is the 482  
same (i.e., ignore). However, when there is a need to differentiate between highly 483  
similar odors, aPC neurons are able to change the odor representation such that their 484  
pattern of activities are decorrelated <sup>22,23,51,52</sup>. 485

Another possible explanation for the reduction in odor identity representations 486  
might be that the encoding ability of aPC is compromised on account of its additional 487  
functions. Recent studies found that aPC neuron-odor responses are concentration 488  
invariant <sup>10,18</sup>. This may suggest that as visual object representations are invariant to 489

scale and rotation in higher visual brain regions, odor representations become 490  
invariant to concentration at the piriform cortex. It is possible that there is an 491  
unavoidable tradeoff between identity coding and concentration invariance in the 492  
olfactory system and that the much larger number of neurons in the aPC compensates 493  
for this reduction in coding accuracy. 494

## **AON versus OB odor coding** 495

Little is known about the exact roles of the AON, the first area to receive 496  
direct input from the OB. OB neurons' projections to the AON preserve some coarse 497  
spatial organization<sup>6</sup> but the functional principles underlying how AON neurons read 498  
the OB patterns remain unknown. Haberly has suggested that OB glomeruli respond 499  
to specific molecular features while AON is tuned to a specific combination of these 500  
molecular features<sup>53</sup>. This interesting hypothesis suggests that AON neurons should 501  
be more selective to odors than OB neurons. However, our result, which is also 502  
supported by a previous study<sup>25</sup>, found that AON neurons are relatively widely tuned 503  
with a larger number of neurons responding to each odor (Figure 1F-G and Figure 1– 504  
figure supplement 1E). 505

Several studies have suggested that AON may be involved in odor localization 506  
by comparing and sharing odor information between the two hemispheres<sup>54–58</sup>. 507  
Neurons that are more responsive to odors irrespective of their identities may be 508  
better suited for comparing left and right inputs because they have higher chances of 509  
responding to the left or right odors. 510

## **Learning and variability in the number of connections** 511

Our simulation suggests a simple and biologically plausible explanation for 512  
the observed increase in similarity and decrease in odor identity representation. We 513



show that assuming a small number of connections with some variability that is 514  
consistent with previous anatomical and electrophysiological studies can explain the 515  
observed results. What is the possible advantage of increasing connection number 516  
variability? Several studies have emphasized plasticity in the PC, pointing to a role in 517  
associative learning and experience-dependent odor recognition<sup>15,59–64</sup>. One 518  
intriguing possibility is that variability accelerates learning. This has been 519  
demonstrated in recurrent neural networks<sup>65</sup> and might point to a more general 520  
mechanism. Assuming all aPC neurons have the same threshold, aPC neurons that 521  
integrate from many OB neurons with equal weights will respond even if only a 522  
subset of their inputs is active, whereas aPC neurons with a small number of 523  
connections will respond only when most of their inputs are active. The highly 524  
connected neurons will tend to respond to many odors, and this will increase the 525  
similarity in neural representation due to large numbers of shared responding neurons. 526  
This process alone is beneficial as long as the odors have no specific association as it 527  
will result in ‘built in’ generalization. However, when an odor is associated with an 528  
outcome, Hebbian learning can strengthen the active connections and weaken the non- 529  
active ones. This procedure will reduce the number of effective connections of these 530  
neurons. At the same time, the effective connection number of neurons with sparse 531  
connections will not change substantially, since for them, receiving input from a 532  
majority of their connections is required to elicit a response. The reduction in 533  
effective connection number of the neurons that have high numbers of connections 534  
will result in reduced variability in the number of effective connections across all 535  
neurons. Reducing the variability would result in decorrelating the odor responses 536  
(Figs. 4,6) and facilitate discrimination. Since high variability increases similarity, 537

learning can be accelerated because it only needs to change the representation of one 538  
stimulus out of many similar ones clustered in one region of the neural space. 539

The exact number, distribution and weights of OB inputs each aPC neuron 540  
integrates from and how these values change during learning is currently unknown. 541  
Future studies that will reveal these values will shed important insights on how odors 542  
are represented and how learning shapes neural networks. 543

544

545

## **MATERIALS AND METHODS** 546

547

### **Mice** 548

All surgical and experimental procedures were conducted in accordance with the 549  
National Institutes of Health Guide for the Care and Use of Laboratory Animals and 550  
the Bar Ilan University guidelines for the use and care of laboratory animals in 551  
research and were approved and supervised by the Institutional Animal Care and Use 552  
Committee (IACUC). 15 wild-type male and female mice aged 3-6 months were used. 553  
The animals were housed in a group cage and received no experimental treatment. 554  
Animals were maintained in a reverse light/dark cycle and all experiments were 555  
performed during their dark cycle. 556

557

### **Surgical Procedures** 558

Mice were first anesthetized with ketamine/medetomidine (60/0.5 mg/kg, I.P.) and 559  
then fixed in a stereotaxic frame. The bone overlying the dorsal OB, the AON or 560  
anterior PC was removed. Additional anesthesia was administered as needed (30% of 561

the original dose of ketamine/medetomidine). The animal's body temperature was  
maintained at 36-37°C using a homeothermic blanket system (Harvard Apparatus).

# **In vivo electrophysiology**

The spiking activity of neurons was recorded extracellularly using custom built four  
or eight tetrodes. Neural signals were recorded using 32 channel recording system  
(Digital Lynx SX, Neuralynx) filtered at 300–6,000 Hz, sampled and recorded at 32  
kHz and stored on a computer. Spike signals were sorted offline using spike3D.  
Clusters with >2% of ISIs violating the refractory period (<2 ms) were manually  
removed from the dataset. Neurons were recorded from the dorsal and ventral  
olfactory bulb. To record from the AON, we inserted the electrodes 1.25 mm laterally,  
-2.6 mm from bregma and 2.2 mm ventrally. To record from the anterior PC, we  
inserted the electrode -2.1 mm from bregma, 1.7 mm laterally and ~3 mm ventrally. A  
total of 101 OB neurons were recorded in 5 mice, 200 aPC neurons in 7 mice and 138  
AON neurons in 3 mice. We recorded respiration using a piezoelectric sensor  
(APS4812B-LW100-R, PUI Audio). For verification of our results we used the data  
published at <sup>32</sup> of simultaneous recordings of OB and aPC. Reported are six odors and  
'blank' mineral oil presented to awake head fixed mice. We used the sessions in  
which each of the six odors and 'blank' were presented 15 times. This dataset contains  
the responses of 271 neurons in OB and 659 in aPC from 10 simultaneous recordings.

# **Odorants**

Odorants were applied using a custom built olfactometer. Odorants were diluted in  
mineral oil (1:100) and stored in sealed glass vials. Odorants were delivered through a  
manifold converging all odor tubes into one tube that was placed in front of the

animal nostrils at a distance of 1 cm. Clean air constantly flowed through the  
converging port to reduce cross-contamination. Airflow was controlled with a mass  
flow controller (Agilent, Alimc-2LSPM) and set to 0.8 l/m. Odor stimulation times  
and sequences were controlled by a custom MATLAB script. Odor delivery time  
occurred at any phase of the respiration cycle, as in natural settings. Odor stimulation  
duration was two seconds, with an inter-trial-interval of 20 seconds of clean air. The  
odor sequence was randomized, and each odor was delivered 20 times. Odorants were  
purchased from Sigma Aldrich at the highest possible purity. The nine odorants used  
were:

| CAS       | CID    | Odor name         | Functional group |
|-----------|--------|-------------------|------------------|
| 111-65-9  | 356    | Octane            | Alkane           |
| 66-25-1   | 6184   | Hexanal           | Aldehyde         |
| 98-86-2   | 7410   | Acetophenone      | Ketone           |
| 106-24-1  | 637566 | Geraniol          | Alcohol          |
| 539-82-2  | 10882  | Ethyl valerate    | Ester            |
| 5392-40-5 | 638011 | Citral            | Aldehyde         |
| 470-67-7  | 2758   | Cineole           | Ether            |
| 60-12-8   | 6054   | Phenethyl alcohol | Alcohol          |
| 5989-27-5 | 440917 | D-limonene        | Alkene           |

**Table 1**

**Analysis**

**Odorants in physicochemical space**

Odorants were represented using 1664 molecular descriptors (Dragon 5, Talet) and  
plotted in PCA space after scaling across odors as in <sup>24,66</sup>. The physicochemical  
similarity between any two odors was computed using the Pearson correlation  
between the odor representations in the 1664 physicochemical space.

603

**Post-stimulus time histograms** 604

To visualize trial-averaged firing rates aligned to the odor start time, spike times were 605  
convolved with a Gaussian filter with a SD of 20ms. We defined the odor start time as 606  
the first inhalation post odor onset. Most of the odor stimulations were initiated during 607  
the exhalation phase. However, when an odor stimulus was initiated during the last 608  
50ms of the inhalation, we defined the odor start time as the following inhalation 609  
event. To estimate the population mean odor-evoked response, we averaged the 610  
PSTHs of the individual neurons for each odor, and then further averaged the nine 611  
resultant mean PSTHs. To allow for a fair comparison across sniffs, we also displayed 612  
the PSTHs with standardized inhalation and respiration cycle durations equal to the 613  
median inhalation and respiration durations in the dataset (200.8 and 628.3ms, 614  
respectively) and reassigned spike times according to their original relative inhalation 615  
or exhalation phase. To visualize the phase-locking distributions, we used this 616  
standardized respiration cycle to compute PSTHs normalized by z-score (for PSTHs 617  
that were not all-zero) for each neuron-odor pair and then sorted the neuron-odor pairs 618  
according to their latency to peak in the first respiration cycle post odor onset. 619

**Neural responses** 620

Evoked responses were calculated as the mean spike count in a sniff window post 621  
odor onset (specified in each analysis), subtracted by the mean spike count in the 622  
equivalent sniff window prior to the odor onset. For the analysis of the data from <sup>19,32</sup> 623  
we calculated the odor evoked responses using the equivalent sniff window post 624  
‘blank’ onset as the baseline activity since awake mice modulate their sniffing 625  
frequency when expecting an odor and during odor sampling. 626

We used spike count and not spike rate because it does not require to divide the  
number of spikes by the respiration duration which increases response variability due  
to inaccuracies in estimating the exact respiration duration. That said, the results of  
this study remained the same when we used spike rates.

Significant responses to odors were defined if the odor-elicited spike counts were  
significantly different than the respective baseline activity, according to the Wilcoxon  
rank-sum test ( $p < 0.05$ ).

Odor neural responses depend on many factors such as, odorant identity, its  
concentration, flow rate and volume, vacuum position and strength, and distance from  
the mouse nostril. Therefore, comparison of correlation and sparseness values  
obtained in one study could be completely irrelevant for another study. Only  
comparisons between datasets collected under the exact same conditions are  
meaningful.

## Sparseness

The response sparseness was measured according to the Treves-Rolls sparseness  
index<sup>26</sup>. The Treves-Rolls methods estimate the amount of non-uniformity of a neural  
response to the stimuli. A neuron that does not respond at all or that responds  
similarly to all stimuli is regarded as uniform, while a neuron that responds to only a  
small number of stimuli is considered sparse or selective. We modified the measure so  
that a value of one will indicate maximal sparseness and zero maximal uniformity<sup>27</sup>.  
The sparseness calculation was further scaled such that it will range between 0 to 1,  
independent of the number of samples<sup>12</sup>. The formula of the sparseness index is thus

defined as follows:  $s = \frac{1 - \frac{[\sum_{i=1}^N r_i]^2}{\sum_{i=1}^N r_i^2}}{1 - \frac{1}{N}}$ . Lifetime sparseness was computed for each neuron,

where  $N$  is the total number of odors and  $r_i$  is the neuron's response to odor  $i$ . 650

Population sparseness was computed for each odor, where  $N$  is the total number of 651

neurons and  $r_i$  is the response of neuron  $i$  to the odor. Sparseness was calculated using 652

the spike counts in the first sniff post odor onset. We used the spike count without 653

subtracting the baseline as suggested in <sup>67</sup>. 654

## **Odor neural representation pairwise similarities** 655

Pairwise similarities between odor representations in each brain region were evaluated 656

by computing the Pearson correlation coefficient between activity vectors of the 657

neurons' average evoked spike counts across all trials. Averaging over trials reduces 658

noise so that the computed correlation more reliably reflects the signal correlation 659

<sup>12,15,28,29</sup>. We used the evoked activity because otherwise the correlation may reflect 660

the strong similarity in baseline activity that is very common in neurons in all 661

olfactory regions. For example, two odors that elicited a response in a small number 662

of non-overlapping neurons may still have a very high correlation value due to the 663

strong resemblance of spontaneous activities in the non-responding neurons. 664

To compare the increase in similarity in the cortex for dissimilar odors and similar 665

odors, the odor pairs were regarded as dissimilar or similar according to their Pearson 666

correlation in the OB or in the physicochemical space. 667

To calculate the Pearson correlations in windows of the first sniff, we considered the 668

baseline activity in the anesthetized database to be the mean spike count in the 669

equivalent window of the last sniff prior to odor onset. To calculate the evoked 670

activity in the window bin ending in time '0' (i.e., the last 1/8 of the last sniff prior to 671

odor onset), we subtracted the mean spike count in the equivalent bin in the second to 672

last sniff prior to odor onset. For the awake database, the baseline activity that was 673

subtracted from the mean spike count in some sniff window of the odor trials, was the  
mean spike count in the equivalent sniff window of the blank trials.

## **Trial variability**

Odor-elicited response trial variability was assessed for the spike counts in the first  
few sniffs post odor onset. The variability was quantified using the coefficient of  
variation (CV), which is defined as the ratio of the standard deviation to the mean  
across trials. The results displayed in Figure 2,3 and Figure 2–figure supplement 1 are  
based on all neuron-odor pairs apart from those with mean spike count of zero.  
Results were qualitatively consistent (aPC > AON > OB) when excluding neuron-  
odor pairs with mean spike count lower than 1. The coefficient of variation was  
chosen over the Fano-factor since it is a dimensionless measurement and therefore  
suitable for comparing the response variability in regions with different means.

## **Decoding analysis**

Odor identity decoding accuracy was estimated using a centroid-based leave-one-out  
linear decoder. The decoder was trained on activity vectors of neurons' spike counts  
in the duration of the number of sniffs taken throughout the odor presentation (3 sniffs  
for our dataset, 2 for the Bolding 2018 dataset). We used the neurons' spike counts as  
a measure for neural activity because it reflects the number of spikes a downstream  
region would receive (similar results were obtained when we used the evoked spike  
counts). Centroid vectors were calculated for each odor as the neurons' mean  
responses across trials. Since a small percentage of the neuron-odor pairs in our  
recordings had a few invalid trials, we used the first 15 valid trials out of the 20 to be  
consistent across neuron-odor pairs. For the Bolding 2018 dataset all 15 trials were



used. The mean response for the test odor was computed by excluding one trial. The  
decoder then classified the left-out trial as the odor with the closest centroid,  
according to the Euclidean distance. The decoding was performed using varying  
numbers of neurons, where the decoding accuracy for each number of tested neurons  
was estimated by the mean  $\pm$  SD of 100 repetitions of randomly selected neurons. In  
each repetition, the accuracy was calculated as the percent correct in 100  
classifications of each odor.

## Modeling

In the first part of our modeling analysis we examined how changing the parameters  
of the previously established Schaffer et al. model<sup>14</sup> affects odor representation. The  
Schaffer model is a feedforward network that is based on a linear transformation and  
rectification using a threshold  $T$ :

$$PC = \Theta(W \cdot OB - T); \text{ where } \Theta(x) = x \text{ if } x > 0 \text{ and } \Theta(x) = 0 \text{ otherwise}$$

where  $OB$  and  $PC$  represent matrices of ‘neurons X odors’ responses of the OB and  
PC neurons, respectively and  $W$  is the connectivity matrix of size (# neurons in PC X  
# neurons in OB). Following this transformation, the PC responses were normalized  
to the 99th percentile value. The threshold was chosen such that an average of 6.2%  
of PC neurons were activated by each odor, matching their imaging data<sup>14</sup>. The  
number of OB and PC neurons was set to 1000 and 10000, respectively. The rate of  
odor-activated OB neurons was set to 10% of the number of OB neurons. The OB  
response magnitudes of the responding neurons were taken from a multivariate  
lognormal distribution. The Schaffer et al. model examined three simulated odor  
classes: Non-class odors are a group of odors that activated non-overlapping sets of

glomeruli. 30% and 70% overlap classes share 30% and 70% of the active glomeruli, 722  
respectively. 723

Each PC neuron was assumed to integrate from a random number of excitatory OB 724  
inputs that were normally distributed with a mean of 200 (i.e., 20%) and a SD of 12 725  
(i.e., 1.2%). Each PC neuron was also assumed to receive counter-balancing 726  
inhibitory inputs. This was modeled by assuming each PC neuron integrates from a 727  
number of OB neurons that were normally distributed with a mean of 400 (i.e., 40%) 728  
and a SD of 15 (i.e., 1.5%) with negative weights. The weights  $W_{ij}$  of the inhibitory 729  
inputs were set to -0.5 and the weights of the excitatory connections were set to 1. 730

To examine how the number of connections or their variability may affect odor 731  
representation, we varied the mean number of connections and the values of the SD of 732  
the normal distributions from which the numbers of inputs were drawn. We kept the 733  
ratio between the number of inhibitory and excitatory connections to two. 734

In the second part of our analysis, we modified and extended the Schaffer et al. model 735  
in several ways. Instead of using simulated OB inputs from a specific predetermined 736  
distribution, we used actual trial-averaged OB data as inputs. We used the Bolding 737  
2018 dataset because it has a larger number of OB neurons, however, the results were 738  
similar when we used the data from our OB dataset. The number of aPC neurons that 739  
were simulated was ten times the number of available OB neurons, to reflect 740  
expansion. We first considered the odor-evoked OB data in the first sniff post odor 741  
onset as inputs to the model. Since we subtracted the baseline activity, our OB 742  
responses had both negative and positive values reflecting inhibitory and excitatory 743  
responses, and we therefore assumed PC neurons integrate from all OB neurons with 744  
equal weights,  $W_{ij} = 1$ . To examine how threshold values affect odor representation 745

we removed the assumption that on average only 6.2% of the PC neurons responded 746  
to odors and tested several threshold values. The odor-evoked OB data allowed us to 747  
examine the effect of the transformation on odor correlation and the corresponding 748  
sparseness levels. We varied the number of connections between the PC and the OB 749  
assuming either a rectified normal or an exponential distribution. The number of 750  
connections was always a positive integer. 751

To examine the decoding accuracy of the modeled data, we simulated PC neurons by 752  
transforming the OB data according to the proposed model and calculated the 753  
decoding accuracy of the simulated neurons. For this analysis, we used the original 754  
OB spike counts in the first two sniffs post odor onset without subtracting the 755  
baseline, consistent with the decoding analysis of the experimental data; however, 756  
congruent results were obtained when we used the OB evoked spike count. As in 757  
Schaffer's model, we set the number of inhibitory connections to be twice as many as 758  
the excitatory ones, with half the efficacy (weights of -0.5 vs 1). We considered the 759  
OB data (neurons X odors X trials), then transformed each trial with the same 760  
connectivity matrix, whose number of connections are chosen from a rectified normal 761  
or an exponential distribution, to calculate the PC responses data (neurons X odors X 762  
trials). With this PC data we estimated the mean decoding success rate of 100 neurons 763  
by averaging over the success rate of 50 sets of 100 randomly chosen neurons from 764  
the total 2710. This procedure was repeated 20 times with different choices of 765  
connectivity matrices drawn from the same probability distributions, and we display 766  
the mean and SD of the success rate of these 20 iterations (Figure 7). 767

## Statistical tests 768

For comparing two normal distributions, the Student's t-test (two-sided) for 770  
independent samples or paired samples was used. For comparing two independent 771  
distributions when normality cannot be assumed, significance was assessed by using 772  
the two-sided Wilcoxon rank sum and signed-rank tests. Standard error of the mean 773  
(SEM) was reported when we estimated the standard deviation (SD) of the sample 774  
mean. SD was reported when the mean was estimated from a bootstrap process. 775

## General experimental design 776

Blinding and sample size estimation are not relevant in this study and therefore were 778  
not conducted. Randomization was performed in all related experiments and analyses. 779

## Data and Code availability 780

All data and code are posted to Dryad (<https://doi.org/10.5061/dryad.h18931z kf>) and 782  
Github (<https://github.com/rafihaddad/>) 783

## Acknowledgments 784

We thank K. Bolding and K. Franks for providing the data of the awake mice and for 785  
fruitful discussions. We thank O. Barak and S.R. Datta for commenting on the 786  
manuscript. This study was supported by a grant from the I-CORE Program of the 787  
Planning and Budgeting Committee and The Israel Science Foundation [51/11 and 788  
204/17]. 789

## Author contribution 790

MB collected the data. CM, MB and RH conceived the idea and performed the 792  
analysis. PK conducted the model simulations. CM, PK and RH wrote the paper. 793

## References

1. Cayco-Gajic, N. A. & Silver, R. A. Review Re-evaluating Circuit Mechanisms Underlying Pattern Separation. (2019). doi:10.1016/j.neuron.2019.01.044
2. Yassa, M. A. & Stark, C. E. L. Pattern separation in the hippocampus. *Trends Neurosci.* **34**, 515–525 (2011).
3. Chacron, M. J., Longtin, A. & Maler, L. Efficient computation via sparse coding in electrosensory neural networks. *Curr. Opin. Neurobiol.* **21**, 752–760 (2011).
4. Keene, A. C. & Waddell, S. Drosophila olfactory memory: single genes to complex neural circuits. *Nat. Rev. Neurosci.* **8**, 341–54 (2007).
5. Lin, A. C., Bygrave, A. M., de Calignon, A., Lee, T. & Miesenböck, G. Sparse, decorrelated odor coding in the mushroom body enhances learned odor discrimination. *Nat. Neurosci.* **17**, 559–568 (2014).
6. Miyamichi, K. *et al.* Cortical representations of olfactory input by trans-synaptic tracing. *Nature* **472**, 191–196 (2011).
7. Sosulski, D. L., Bloom, M. L., Cutforth, T., Axel, R. & Datta, S. R. Distinct representations of olfactory information in different cortical centres. *Nature* **472**, 213–216 (2011).
8. Kay, R. B., Meyer, E. A., Illig, K. R. & Brunjes, P. C. Spatial distribution of neural activity in the anterior olfactory nucleus evoked by odor and electrical stimulation. *J. Comp. Neurol.* **519**, 277–289 (2011).
9. Babadi, B. & Sompolinsky, H. Sparseness and expansion in sensory representations. *Neuron* **83**, 1213–26 (2014).
10. Roland, B., Deneux, T., Franks, K. M., Bathellier, B. & Fleischmann, A. Odor identity coding by distributed ensembles of neurons in the mouse olfactory cortex. *Elife* **6**, 1–26 (2017).
11. Stettler, D. D. & Axel, R. Representations of odor in the piriform cortex. *Neuron* **63**, 854–864 (2009).
12. Miura, K., Mainen, Z. F. & Uchida, N. Odor representations in olfactory cortex: distributed rate coding and decorrelated population activity. *Neuron* **74**, 1087–1098 (2012).
13. Poo, C. & Isaacson, J. S. Odor representations in olfactory cortex: ‘sparse’

|     |                                                                                                                                                                                                           |                   |
|-----|-----------------------------------------------------------------------------------------------------------------------------------------------------------------------------------------------------------|-------------------|
|     | coding, global inhibition, and oscillations. <i>Neuron</i> <b>62</b> , 850–61 (2009).                                                                                                                     | 827               |
| 14. | Schaffer, E. S. <i>et al.</i> Odor Perception on the Two Sides of the Brain: Consistency Despite Randomness. <i>Neuron</i> <b>98</b> , 736-742.e3 (2018).                                                 | 828<br>829        |
| 15. | Pashkovski, S. L. <i>et al.</i> Structure and flexibility in cortical representations of odour space. <i>Nature</i> 1–6 (2020). doi:10.1038/s41586-020-2451-1                                             | 830<br>831        |
| 16. | Bolding, K. A., Nagappan, S., Han, B.-X., Wang, F. & Franks, K. M. Recurrent circuitry is required to stabilize piriform cortex odor representations across brain states. <i>Elife</i> <b>9</b> , (2020). | 832<br>833<br>834 |
| 17. | Srinivasan, S. & Stevens, C. F. The distributed circuit within the piriform cortex makes odor discrimination robust. <i>J. Comp. Neurol.</i> <b>526</b> , 2725–2743 (2018).                               | 835<br>836<br>837 |
| 18. | Bolding, K. A. & Franks, K. M. Complementary codes for odor identity and intensity in olfactory cortex. <i>Elife</i> <b>6</b> , 1–26 (2017).                                                              | 838<br>839        |
| 19. | Bolding & Franks. Recurrent cortical circuits implement concentration-invariant odor coding. <i>Science</i> (80-. ). <b>361</b> , (2018).                                                                 | 840<br>841        |
| 20. | Bekkers, J. M. & Suzuki, N. Neurons and circuits for odor processing in the piriform cortex. <i>Trends Neurosci.</i> <b>36</b> , 429–438 (2013).                                                          | 842<br>843        |
| 21. | Gottfried, J. A. Central mechanisms of odour object perception. <i>Nat. Rev. Neurosci.</i> <b>11</b> , 628–641 (2010).                                                                                    | 844<br>845        |
| 22. | Barnes, D. C., Hofacer, R. D., Zaman, A. R., Rennaker, R. L. & Wilson, D. A. Olfactory perceptual stability and discrimination. <i>Nat Neurosci</i> <b>11</b> , 1378–1380 (2008).                         | 846<br>847<br>848 |
| 23. | Wilson, D. A. Pattern separation and completion in olfaction. <i>Ann N Y Acad Sci</i> <b>1170</b> , 306–312 (2009).                                                                                       | 849<br>850        |
| 24. | Haddad, R. <i>et al.</i> A metric for odorant comparison. <i>Nat Methods</i> <b>5</b> , 425–429 (2008).                                                                                                   | 851<br>852        |
| 25. | Lei, H., Mooney, R. & Katz, L. C. Synaptic integration of olfactory information in mouse anterior olfactory nucleus. <i>J. Neurosci.</i> <b>26</b> , 12023–32 (2006).                                     | 853<br>854<br>855 |
| 26. | Treves, A. & Rolls, E. T. What determines the capacity of autoassociative memories in the brain? <i>Netw. Comput. Neural Syst.</i> <b>2</b> , 371–397 (1991).                                             | 856<br>857        |
| 27. | Willmore, B. & Tolhurst, D. J. Characterizing the sparseness of neural codes. <i>Netw. Comput. Neural Syst.</i> <b>12</b> , 255–270 (2001).                                                               | 858<br>859        |
| 28. | Gschwend, O. <i>et al.</i> Neuronal pattern separation in the olfactory bulb improves                                                                                                                     | 860               |

odor discrimination learning. *Nat. Neurosci.* **18**, pages1474–1482 (2015). 861

29. Otazu, G. H., Chae, H., Davis, M. B. & Albeanu, D. F. Cortical Feedback 862  
Decorrelates Olfactory Bulb Output in Awake Mice. *Neuron* **86**, 1461–1477 863  
(2015). 864

30. Cury, K. M. & Uchida, N. Robust odor coding via inhalation-coupled transient 865  
activity in the mammalian olfactory bulb. *Neuron* **68**, 570–585 (2010). 866

31. Margrie, T. W. & Schaefer, A. T. Theta oscillation coupled spike latencies 867  
yield computational vigour in a mammalian sensory system. *J. Physiol.* **546**, 868  
363–74 (2003). 869

32. Bolding Kevin A. Franks Kevin M. Simultaneous extracellular recordings from 870  
mice olfactory bulb (OB) and piriform cortex (PCx) and respiration data in 871  
response to odor stimuli and optogenetic stimulation of OB. *CRCNS.org* 872  
<http://dx.doi.org/10.6080/K00C4SZB> (2018). 873

33. Davison, I. G. & Ehlers, M. D. Neural circuit mechanisms for pattern detection 874  
and feature combination in olfactory cortex. *Neuron* **70**, 82–94 (2011). 875

34. Wiechert, M. T., Judkewitz, B., Riecke, H. & Friedrich, R. W. Mechanisms of 876  
pattern decorrelation by recurrent neuronal circuits. *Nat. Neurosci.* **13**, 1003– 877  
1010 (2010). 878

35. DiCarlo, J. J., Zoccolan, D. & Rust, N. C. How does the brain solve visual 879  
object recognition? *Neuron* **73**, 415–434 (2012). 880

36. Li, W. L. *et al.* Adult-born neurons facilitate olfactory bulb pattern separation 881  
during task engagement. *Elife* **7**, 1–26 (2018). 882

37. Yamada, Rodriguez, I. & Carleton, A. Context- and Output Layer-Dependent 883  
Long-Term Ensemble Plasticity in a Sensory Circuit. 1198–1212 (2017). 884  
[doi:10.1016/j.neuron.2017.02.006](https://doi.org/10.1016/j.neuron.2017.02.006) 885

38. Chu, M. W., Li, W. L. & Komiyama, T. Balancing the Robustness and 886  
Efficiency of Odor Representations during Learning. *Neuron* **92**, (2016). 887

39. Rinberg, D., Koulakov, A. & Gelperin, A. Sparse odor coding in awake 888  
behaving mice. *J. Neurosci.* **26**, 8857 (2006). 889

40. Kato, H. K., Chu, M. W., Isaacson, J. S. & Komiyama, T. Dynamic sensory 890  
representations in the olfactory bulb: modulation by wakefulness and 891  
experience. *Neuron* **76**, 962–975 (2012). 892

41. Kollo, M., Schmaltz, A., Abdelhamid, M., Fukunaga, I. & Schaefer, A. T. 893  
‘Silent’ mitral cells dominate odor responses in the olfactory bulb of awake 894



mice. *Nat. Neurosci.* **17**, 1313–1315 (2014). 895

42. Hagiwara, A., Pal, S. K., Sato, T. F., Wienisch, M. & Murthy, V. N. 896  
Optophysiological analysis of associational circuits in the olfactory cortex. 897  
*Front. Neural Circuits* 6:18 (2012). doi:10.3389/fncir.2012.00018 898

43. Haberly, L. B. & Price, J. L. Association and commissural fiber systems of the 899  
olfactory cortex of the rat. *J. Comp. Neurol.* **178**, 711–40 (1978). 900

44. Gottfried, J. A., Winston, J. S. & Dolan, R. J. Dissociable codes of odor quality 901  
and odorant structure in human piriform cortex. *Neuron* **49**, 467–479 (2006). 902

45. Howard, J. D., Plailly, J., Grueschow, M., Haynes, J. D. & Gottfried, J. A. 903  
Odor quality coding and categorization in human posterior piriform cortex. *Nat* 904  
*Neurosci* **12**, 932–938 (2009). 905

46. Kadohisa, M. & Wilson, D. A. Separate encoding of identity and similarity of 906  
complex familiar odors in piriform cortex. *Proc. Natl. Acad. Sci. U. S. A.* **103**, 907  
15206–15211 (2006). 908

47. Gire, D. H., Whitesell, J. D., Doucette, W. & Restrepo, D. Information for 909  
decision-making and stimulus identification is multiplexed in sensory cortex. 910  
*Nat. Neurosci.* **16**, 991–3 (2013). 911

48. Morrison, G. L., Fontaine, C. J., Harley, C. W. & Yuan, Q. A role for the 912  
anterior piriform cortex in early odor preference learning: Evidence for 913  
multiple olfactory learning structures in the rat pup. *J. Neurophysiol.* **110**, 141– 914  
152 (2013). 915

49. Terral, G. *et al.* CB1 Receptors in the Anterior Piriform Cortex Control Odor 916  
Preference Memory. *Curr. Biol.* **29**, 2455–2464.e5 (2019). 917

50. Mediavilla, C., Martin-Signes, M. & Risco, S. Role of anterior piriform cortex 918  
in the acquisition of conditioned flavour preference. *Sci. Rep.* **6**, 33365 (2016). 919

51. Chapuis, J. & Wilson, D. A. Bidirectional plasticity of cortical pattern 920  
recognition and behavioral sensory acuity. *Nat. Neurosci.* **15**, 155–161 (2012). 921

52. Shakhawat, A. M. D., Harley, C. W. & Yuan, Q. Arc visualization of odor 922  
objects reveals experiencedependent ensemble sharpening, separation, and 923  
merging in anterior piriform cortex in adult rat. *J. Neurosci.* **34**, 10206–10210 924  
(2014). 925

53. Haberly, L. B. Parallel-distributed processing in olfactory cortex: new insights 926  
from morphological and physiological analysis of neuronal circuitry. *Chem* 927  
*Senses* **26**, 551–576 (2001). 928



|     |                                                                                                                                                                                                                                                |                   |
|-----|------------------------------------------------------------------------------------------------------------------------------------------------------------------------------------------------------------------------------------------------|-------------------|
| 54. | Esquivelzeta Rabell, J., Mutlu, K., Noutel, J., Martin del Olmo, P. & Haesler, S. Spontaneous Rapid Odor Source Localization Behavior Requires Interhemispheric Communication. <i>Curr. Biol.</i> <b>27</b> , 1542-1548.e4 (2017).             | 929<br>930<br>931 |
| 55. | Yan, Z. <i>et al.</i> Precise circuitry links bilaterally symmetric olfactory maps. <i>Neuron</i> <b>58</b> , 613–624 (2008).                                                                                                                  | 932<br>933        |
| 56. | Kikuta, S. <i>et al.</i> From the Cover: Neurons in the anterior olfactory nucleus pars externa detect right or left localization of odor sources. <i>Proc Natl Acad Sci U S A</i> <b>107</b> , 12363–12368 (2010).                            | 934<br>935<br>936 |
| 57. | Grobman, M. <i>et al.</i> A Mirror-Symmetric Excitatory Link Coordinates Odor Maps across Olfactory Bulbs and Enables Odor Perceptual Unity. <i>Neuron</i> <b>99</b> , 800-813.e6 (2018).                                                      | 937<br>938<br>939 |
| 58. | Dalal, T., Gupta, N. & Haddad, R. Bilateral and unilateral odor processing and odor perception. <i>Commun. Biol.</i> <b>3</b> , 150 (2020).                                                                                                    | 940<br>941        |
| 59. | Choi, G. B. <i>et al.</i> Driving opposing behaviors with ensembles of piriform neurons. <i>Cell</i> <b>146</b> , 1004–1015 (2011).                                                                                                            | 942<br>943        |
| 60. | Franks, K. M. <i>et al.</i> Recurrent circuitry dynamically shapes the activation of piriform cortex. <i>Neuron</i> <b>72</b> , 49–56 (2011).                                                                                                  | 944<br>945        |
| 61. | Wilson, D. a & Sullivan, R. M. Cortical processing of odor objects. <i>Neuron</i> <b>72</b> , 506–19 (2011).                                                                                                                                   | 946<br>947        |
| 62. | Fletcher, M. L. & Wilson, D. A. Experience modifies olfactory acuity: acetylcholine-dependent learning decreases behavioral generalization between similar odorants. <i>J. Neurosci.</i> <b>22</b> , RC201 (2002).                             | 948<br>949<br>950 |
| 63. | Linster, C., Henry, L., Kadohisa, M. & Wilson, D. A. Synaptic adaptation and odor-background segmentation. <i>Neurobiol Learn Mem</i> <b>87</b> , 352–360 (2007).                                                                              | 951<br>952        |
| 64. | Linster, C., Menon, A. V, Singh, C. Y. & Wilson, D. A. Odor-specific habituation arises from interaction of afferent synaptic adaptation and intrinsic synaptic potentiation in olfactory cortex. <i>Learn Mem</i> <b>16</b> , 452–459 (2009). | 953<br>954<br>955 |
| 65. | Schuessler, F., Mastrogiuseppe, F., Dubreuil, A., Ostojic, S. & Barak, O. The interplay between randomness and structure during learning in RNNs. <i>arXiv</i> (2020).                                                                         | 956<br>957<br>958 |
| 66. | Haddad, R. <i>et al.</i> Global features of neural activity in the olfactory system form a parallel code that predicts olfactory behavior and perception. <i>J Neurosci</i> <b>30</b> , 9017–9026 (2010).                                      | 959<br>960<br>961 |
| 67. | Rolls, E. T. & Tovee, M. J. Sparseness of the neuronal representation of stimuli                                                                                                                                                               | 962               |

in the primate temporal visual cortex. *J. Neurophysiol.* **73**, 713–726 (1995). 963  
964

## Supplementary figures

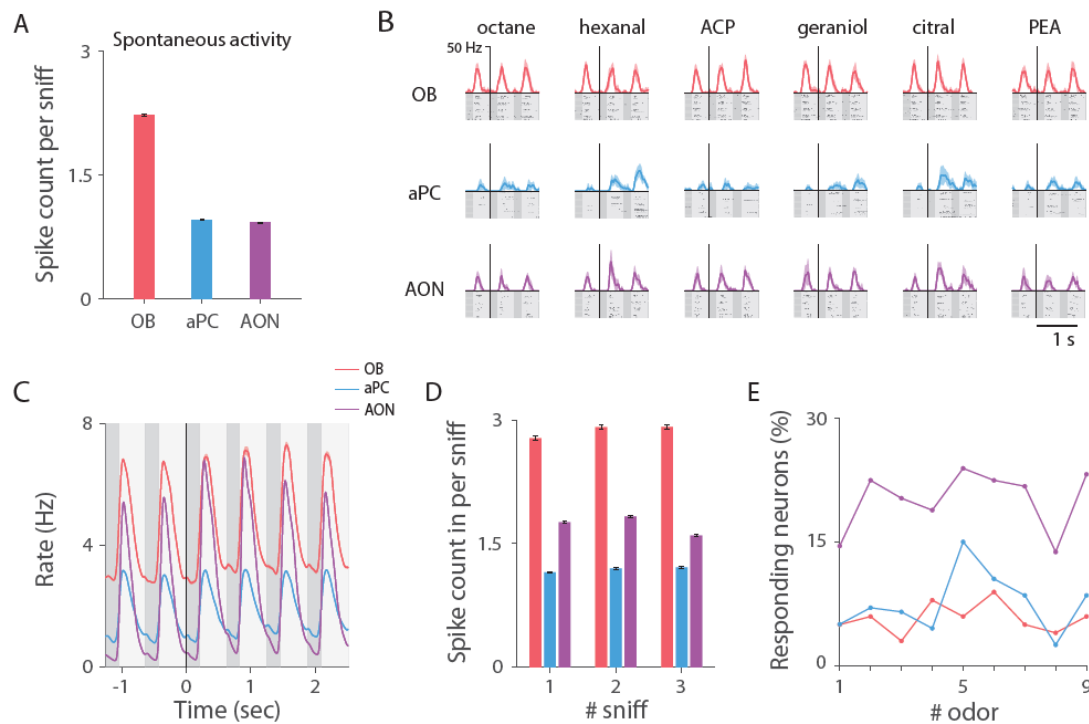

**Figure 1-figure supplement 1. Odor-evoked activity in the olfactory bulb, anterior piriform cortex and anterior olfactory nucleus.** (A) Mean  $\pm$  SEM of the spontaneous spike count per sniff (assessed in the seven sniffs prior to odor onset across all trials). (B) Same examples as in Fig. 1C when the respiration cycle is standardized, as described in Fig. 1D. Raster plots and PSTHs are aligned to the first inhalation post odor onset. Color code as in Fig. 1C. (C) Average PSTH of all odors' mean elicited responses across all neurons, when respiration cycle is standardized as in Fig. 1D. (D) Mean  $\pm$  SEM of the spike count in the first three sniffs post odor onset, across all trials of all odors. (E) Percentage of neurons that significantly responded to each of the nine odors in the first sniff post odor onset ( $p < 0.05$ , Wilcoxon rank-sum test). AON neurons are more odor responsive than OB and aPC neurons.

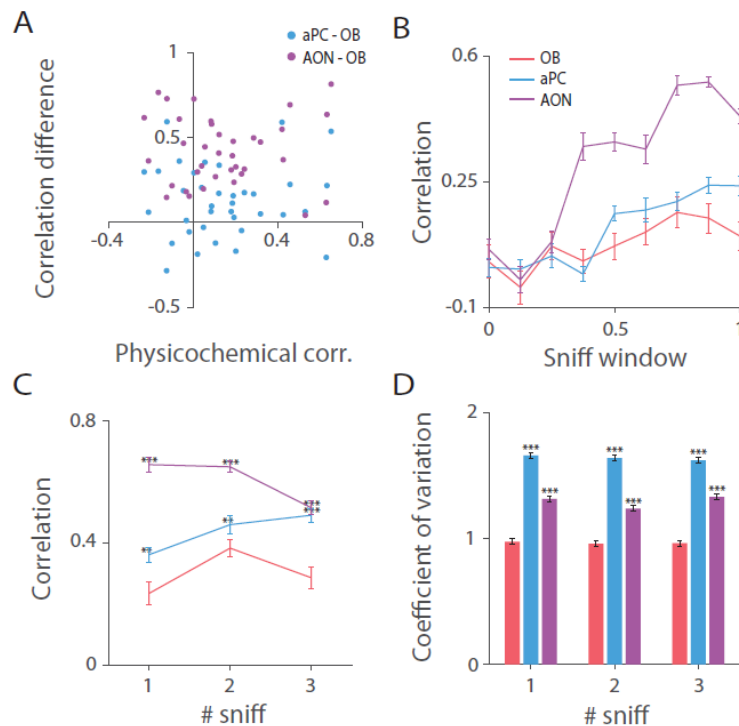

**Figure 2–figure supplement 1. Odor identity is best represented in the olfactory bulb.**

(A). 36 odor-pair correlation differences in the first sniff between the cortical regions and OB versus correlations computed in the physicochemical space (Methods). Odor similarity increases in the cortex compared to the OB for odor pairs of all similarity levels. (B) Mean  $\pm$  SEM odor pairwise correlations computed in moving windows of the first sniff post odor onset (window size is an 1/8 of the sniff). (C) Mean  $\pm$  SEM of odor pairwise correlations across the first three sniffs post odor onset. Odor pairwise similarity levels are consistently higher in the aPC and AON than in the OB. Significant differences are indicated above the cortical regions, marked by: \*  $p < 0.05$ , \*\*  $p < 0.01$ , \*\*\*  $p < 0.001$  (paired t-test for each sniff, OB vs aPC or OB vs AON,  $df = 35$ ). (D) Mean  $\pm$  SEM coefficient of variation across trials in the first three sniffs. Significant differences (Wilcoxon rank-sum test for each sniff, OB vs aPC or OB vs AON) are marked as in (C).

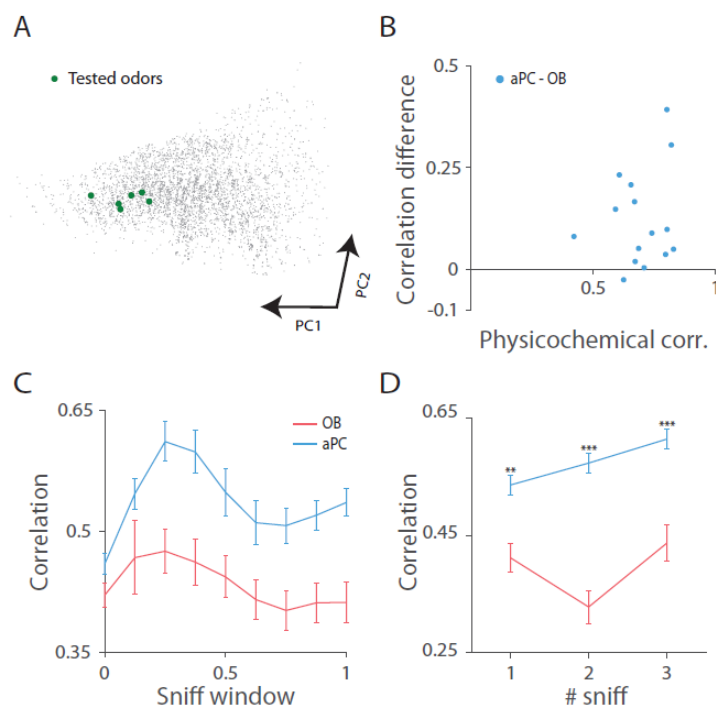

**Figure 3—figure supplement 1. Data of OB and aPC published in (Bolding and Franks, 2018; Bolding Kevin A. Franks Kevin M., 2018).** (A) 4359 odorant molecules depicted in principal component space (Methods). Green circles mark the odorants used in the study. (B) 15 odor-pair correlation differences in the first sniff between the aPC and OB versus correlations computed in the physicochemical space (Methods). Odor similarity increases in the cortex compared to the OB for odor pairs of differing similarity levels. (C) Mean  $\pm$  SEM odor pairwise correlations calculated using the activity in accumulative windows of the first sniff post odor onset (window size is an 1/8 of the sniff). (D) Mean  $\pm$  SEM of odor pairwise correlations across the first three sniffs post odor onset (paired t-test for each sniff, OB vs aPC,  $df = 14$ ).
